# Supplementary material for: Effect of Attention Mechanism in Deep Learning-Based Remote Sensing Image Processing: A Systematic Literature Review
Source: MDPI journal article supplement (doi:10.3390/rs13152965), 2021-07-28
Supplement: s1 [file s1]

Abdulsamad, T., Chen, F., Xue, Y., Wang, Y., Yang, L., & Zeng, D. (2021). Hyperspectral image classification based on spectral and spatial information using ResNet with channel attention. *Optical and Quantum Electronics*, 53

Alhichri, H., Alswayed, A.S., Bazi, Y., Ammour, N., & Alajlan, N.A. (2021). Classification of Remote Sensing Images Using EfficientNet-B3 CNN Model with Attention. *IEEE Access*, 9, 14078-14094

Ali, M.U., Sultani, W., & Ali, M. (2020). Destruction from sky: Weakly supervised approach for destruction detection in satellite imagery. *ISPRS Journal of Photogrammetry and Remote Sensing*, 162, 115-124

Alshehri, A., Bazi, Y., Ammour, N., Almubarak, H., & Alajlan, N. (2019). Deep Attention Neural Network for Multi-Label Classification in Unmanned Aerial Vehicle Imagery. *IEEE Access*, 7, 119873-119880

An, Y., Long, J., & Mabu, S. (2020). A segmentation network with multiattention and its application to SAR image analysis. *IEEE Transactions on Electrical and Electronic Engineering*, 15, 570-576

Bahri, A., Majelan, S.G., Mohammadi, S., Noori, M., & Mohammadi, K. (2020). Remote Sensing Image Classification via Improved Cross-Entropy Loss and Transfer Learning Strategy Based on Deep Convolutional Neural Networks. *IEEE Geoscience and Remote Sensing Letters*, 17, 1087-1091

Bi, Q., Qin, K., Zhang, H., Li, Z.L., & Xu, K. (2020). RADNet: A residual attention based convolution network for aerial scene classification. *Neurocomputing*, 377, 345-359

Bi, Q., Qin, K., Zhang, H., Xie, J., Li, Z., & Xu, K. (2020). APDC-Net: Attention Pooling-Based Convolutional Network for Aerial Scene Classification. *IEEE Geoscience and Remote Sensing Letters*, 17, 1603-1607

Campos-Taberner, M., Garcia-Haro, F.J., Martinez, B., Izquierdo-Verdiguier, E., Atzberger, C., Camps-Valls, G., & Gilabert, M.A. (2020). Understanding deep learning in land use classification based on Sentinel-2 time series. *Scientific Reports*, 10, 12

Cao, R., Fang, L., Lu, T., & He, N. (2021). Self-Attention-Based Deep Feature Fusion for Remote Sensing Scene Classification. *IEEE Geoscience and Remote Sensing Letters*, 18, 43-47

Censi, A.M., Ienco, D., Gbodio, Y.J.E., Pensa, R.G., Interdonato, R., & Gaetano, R. (2021). Attentive Spatial Temporal Graph CNN for Land Cover Mapping from Multi Temporal Remote Sensing Data. *IEEE Access*, 9, 23070-23082

Chen, C., He, C., Hu, C., Pei, H., & Jiao, L. (2019). A Deep Neural Network Based on an Attention Mechanism for SAR Ship Detection in Multiscale and Complex Scenarios. *IEEE Access*, 7, 104848-104863

Chen, H., Chen, R., & Li, N.N. Attentive generative adversarial network for removing thin cloud from a single remote sensing image. *IET Image Processing*, 12

Chen, J., Wan, L., Zhu, J., Xu, G., & Deng, M. (2020). Multi-Scale Spatial and Channel-wise Attention for Improving Object Detection in Remote Sensing Imagery. *IEEE Geoscience and Remote Sensing Letters*, 17, 681-685

Chen, J., Yuan, Z., Peng, J., Chen, L., Huang, H., Zhu, J., Liu, Y., & Li, H. (2021). DASNet: Dual Attentive Fully Convolutional Siamese Networks for Change Detection in High-Resolution Satellite Images. *IEEE Journal of Selected Topics in Applied Earth Observations and Remote Sensing*, 14, 1194-1206

- Chen, J.B., Wang, C.Y., Ma, Z., Chen, J.S., He, D.X., & Ackland, S. (2018). Remote Sensing Scene Classification Based on Convolutional Neural Networks Pre-Trained Using Attention-Guided Sparse Filters. *Remote Sensing*, 10, 16
- Chen, L., Zhang, D.Z., Li, P., & Lv, P. (2020). Change Detection of Remote Sensing Images Based on Attention Mechanism. *Computational Intelligence and Neuroscience*, 2020, 11
- Chen, L.F., Cui, X.L., Li, Z.H., Yuan, Z.H., Xing, J., Xing, X.M., & Jia, Z.W. (2019). A New Deep Learning Algorithm for SAR Scene Classification Based on Spatial Statistical Modeling and Features Re-Calibration. *Sensors*, 19, 22
- Chen, L.F., Tan, S.Y., Pan, Z.H., Xing, J., Yuan, Z.H., Xing, X.M., & Zhang, P. (2020). A New Framework for Automatic Airports Extraction from SAR Images Using Multi-Level Dual Attention Mechanism. *Remote Sensing*, 12, 24
- Chen, L.F., Weng, T., Xing, J., Pan, Z.H., Yuan, Z.H., Xing, X.M., & Zhang, P. (2020). A New Deep Learning Network for Automatic Bridge Detection from SAR Images Based on Balanced and Attention Mechanism. *Remote Sensing*, 12, 19
- Chen, L.F., Zhang, P., Xing, J., Li, Z.H., Xing, X.M., & Yuan, Z.H. (2020). A Multi-Scale Deep Neural Network for Water Detection from SAR Images in the Mountainous Areas. *Remote Sensing*, 12, 21
- Chen, S., Zhan, R., Wang, W., & Zhang, J. (2021). Learning Slimming SAR Ship Object Detector through Network Pruning and Knowledge Distillation. *IEEE Journal of Selected Topics in Applied Earth Observations and Remote Sensing*, 14, 1267-1282
- Chen, S.Q., Zhan, R.H., & Zhang, J. (2019). Regional attention-based single shot detector for SAR ship detection. *Journal of Engineering-Joe*, 2019, 7381-7384
- Cheng, B., Li, Z.Z., Xu, B.T., Yao, X., Ding, Z.Q., & Qin, T.Q. (2021). Structured Object-Level Relational Reasoning CNN-Based Target Detection Algorithm in a Remote Sensing Image. *Remote Sensing*, 13, 26
- Cheng, W.S., Yang, W., Wang, M., Wang, G., & Chen, J.Y. (2019). Context Aggregation Network for Semantic Labeling in Aerial Images. *Remote Sensing*, 11, 19
- Cui, W., Wang, F., He, X., Zhang, D.Y., Xu, X.X., Yao, M., Wang, Z.W., & Huang, J.J. (2019). Multi-Scale Semantic Segmentation and Spatial Relationship Recognition of Remote Sensing Images Based on an Attention Model. *Remote Sensing*, 11, 22
- Ding, L., Tang, H., & Bruzzone, L. (2021). LANet: Local Attention Embedding to Improve the Semantic Segmentation of Remote Sensing Images. *IEEE Transactions on Geoscience and Remote Sensing*, 59, 426-435
- Dong, R.M., Li, W.J., Fu, H.H., Gan, L., Yu, L., Zheng, J.P., & Xia, M.C. (2020). Oil palm plantation mapping from high-resolution remote sensing images using deep learning. *International Journal of Remote Sensing*, 41, 2022-2046
- Dong, X., Sun, X., Jia, X., Xi, Z., Gao, L., & Zhang, B. (2021). Remote Sensing Image Super-Resolution Using Novel Dense-Sampling Networks. *IEEE Transactions on Geoscience and Remote Sensing*, 59, 1618-1633
- Feng, J., Wu, X., Shang, R., Sui, C., Li, J., Jiao, L., & Zhang, X. (2020). Attention Multibranch Convolutional Neural Network for Hyperspectral Image Classification Based on Adaptive Region Search. *IEEE Transactions on Geoscience and Remote Sensing*

- Feng, Q.L., Yang, J.Y., Liu, Y.M., Ou, C., Zhu, D.H., Niu, B.W., Liu, J.T., & Li, B.G. (2020). Multi-Temporal Unmanned Aerial Vehicle Remote Sensing for Vegetable Mapping Using an Attention-Based Recurrent Convolutional Neural Network. *Remote Sensing*, 12, 22
- Fu, J., Sun, X., Wang, Z., & Fu, K. (2021). An Anchor-Free Method Based on Feature Balancing and Refinement Network for Multiscale Ship Detection in SAR Images. *IEEE Transactions on Geoscience and Remote Sensing*, 59, 1331-1344
- Gao, F., He, Y.S., Wang, J., Hussain, A., & Zhou, H.Y. (2020). Anchor-free Convolutional Network with Dense Attention Feature Aggregation for Ship Detection in SAR Images. *Remote Sensing*, 12, 25
- Gao, H., Cao, L., Yu, D., Xiong, X., & Cao, M. (2020). Semantic Segmentation of Marine Remote Sensing Based on a Cross Direction Attention Mechanism. *IEEE Access*, 8, 142483-142494
- Gao, H., Miao, Y., Cao, X., & Li, C. (2021). Densely Connected Multiscale Attention Network for Hyperspectral Image Classification. *IEEE Journal of Selected Topics in Applied Earth Observations and Remote Sensing*, 14, 2563-2576
- Gao, H., Yang, Y., Yao, D., & Li, C. (2019). Hyperspectral Image Classification with Pre-Activation Residual Attention Network. *IEEE Access*, 7, 176587-176599
- Gao, Y., Shi, J., Li, J., & Wang, R. (2021). Remote sensing scene classification based on high-order graph convolutional network. *European Journal of Remote Sensing*, 54, 141-155
- Gavriil, K., Muntingh, G., & Barrowclough, O.J.D. (2019). Void Filling of Digital Elevation Models with Deep Generative Models. *IEEE Geoscience and Remote Sensing Letters*, 16, 1645-1649
- Gbodjo, Y.J.E., Ienco, D., Leroux, L., Interdonato, R., Gaetano, R., & Ndao, B. (2020). Object-based multi-temporal and multi-source land cover mapping leveraging hierarchical class relationships. *Remote Sensing*, 12, 1-28
- Gu, Z.Q., Zhan, Z.Q., Yuan, Q.Q., & Yan, L. (2019). Single Remote Sensing Image Dehazing Using a Prior-Based Dense Attentive Network. *Remote Sensing*, 11, 20
- Guo, D., Xia, Y., & Luo, X. (2020). Scene Classification of Remote Sensing Images Based on Saliency Dual Attention Residual Network. *IEEE Access*, 8, 6344-6357
- Guo, H., Liu, J., Yang, J., Xiao, Z., & Wu, Z. (2020). Deep Collaborative Attention Network for Hyperspectral Image Classification by Combining 2-D CNN and 3-D CNN. *IEEE Journal of Selected Topics in Applied Earth Observations and Remote Sensing*, 13, 4789-4802
- Guo, W., Ye, H., & Cao, F. (2021). Feature-Grouped Network With Spectral-Spatial Connected Attention for Hyperspectral Image Classification. *IEEE Transactions on Geoscience and Remote Sensing*
- Guo, Y., Ji, J., Lu, X., Huo, H., Fang, T., & Li, D. (2019). Global-Local Attention Network for Aerial Scene Classification. *IEEE Access*, 7, 67200-67212
- Guo, Y.N., Cao, X.Q., Liu, B.N., & Gao, M. (2020). Cloud Detection for Satellite Imagery Using Attention-Based U-Net Convolutional Neural Network. *Symmetry-Basel*, 12, 15
- Hang, R.L., Li, Z., Liu, Q.S., Ghamisi, P., & Bhattacharyya, S.S. (2021). Hyperspectral Image Classification With Attention-Aided CNNs. *IEEE Transactions on Geoscience and Remote Sensing*, 59, 2281-2293
- Haut, J.M., Fernandez-Beltran, R., Paoletti, M.E., Plaza, J., & Plaza, A. (2019). Remote Sensing Image Superresolution Using Deep Residual Channel Attention. *IEEE Transactions on Geoscience and Remote Sensing*, 57, 9277-9289

- Haut, J.M., Paoletti, M.E., Plaza, J., Plaza, A., & Li, J. (2019). Visual Attention-Driven Hyperspectral Image Classification. *IEEE Transactions on Geoscience and Remote Sensing*, 57, 8065-8080
- He, N., Fang, L., & Plaza, A. (2020). Hybrid first and second order attention Unet for building segmentation in remote sensing images. *Science China Information Sciences*, 63
- He, X., Chen, Y., & Ghamisi, P. (2020). Heterogeneous Transfer Learning for Hyperspectral Image Classification Based on Convolutional Neural Network. *IEEE Transactions on Geoscience and Remote Sensing*, 58, 3246-3263
- He, X., Chen, Y.S., & Lin, Z.H. (2021). Spatial-Spectral Transformer for Hyperspectral Image Classification. *Remote Sensing*, 13, 21
- Hu, H., Li, Z., Li, L., Yang, H., & Zhu, H. (2020). Classification of Very High-Resolution Remote Sensing Imagery Using a Fully Convolutional Network with Global and Local Context Information Enhancements. *IEEE Access*, 8, 14606-14619
- Hua, Y., Mou, L., & Zhu, X.X. (2019). Recurrently exploring class-wise attention in a hybrid convolutional and bidirectional LSTM network for multi-label aerial image classification. *ISPRS Journal of Photogrammetry and Remote Sensing*, 149, 188-199
- Huang, H., Pu, C.Y., Li, Y., & Duan, Y.L. (2020). Adaptive Residual Convolutional Neural Network for Hyperspectral Image Classification. *IEEE Journal of Selected Topics in Applied Earth Observations and Remote Sensing*, 13, 2520-2531
- Ienco, D., Gbodjo, Y.J.E., Gaetano, R., & Interdonato, R. (2020). Weakly Supervised Learning for Land Cover Mapping of Satellite Image Time Series via Attention-Based CNN. *IEEE Access*, 8, 179547-179560
- Ji, J., Zhang, T., Jiang, L., Zhong, W., & Xiong, H. (2020). Combining Multilevel Features for Remote Sensing Image Scene Classification with Attention Model. *IEEE Geoscience and Remote Sensing Letters*, 17, 1647-1651
- Ji, S.P., Yu, D.W., Shen, C.Y., Li, W.L., & Xu, Q. (2020). Landslide detection from an open satellite imagery and digital elevation model dataset using attention boosted convolutional neural networks. *Landslides*, 17, 1337-1352
- Jiang, H.W., Hu, X.Y., Li, K., Zhang, J.M., Gong, J.Q., & Zhang, M. (2020). PGA-SiamNet: Pyramid Feature-Based Attention-Guided Siamese Network for Remote Sensing Orthoimagery Building Change Detection. *Remote Sensing*, 12, 21
- Jiang, Y., Li, Y., Zou, S., Zhang, H., & Bai, Y. (2021). Hyperspectral Image Classification With Spatial Consistence Using Fully Convolutional Spatial Propagation Network. *IEEE Transactions on Geoscience and Remote Sensing*
- Lei, P.C., & Liu, C. (2020). Inception residual attention network for remote sensing image super-resolution. *International Journal of Remote Sensing*, 41, 9565-9587
- Li, C.Y., Luo, B., Hong, H.L., Su, X., Wang, Y.J., Liu, J., Wang, C.J., Zhang, J., & Wei, L.H. (2020). Object Detection Based on Global-Local Saliency Constraint in Aerial Images. *Remote Sensing*, 12, 22
- Li, F., Feng, R., Han, W., & Wang, L. (2020). High-Resolution Remote Sensing Image Scene Classification via Key Filter Bank Based on Convolutional Neural Network. *IEEE Transactions on Geoscience and Remote Sensing*, 58, 8077-8092
- Li, J., Lin, D.Y., Wang, Y., Xu, G.L., Zhang, Y.Y., Ding, C.B., & Zhou, Y.H. (2020). Deep Discriminative Representation Learning with Attention Map for Scene Classification. *Remote Sensing*, 12, 22

- Li, J.J., Cui, R.X., Li, B., Song, R., Li, Y.S., & Du, Q. (2019). Hyperspectral Image Super-Resolution with 1D-2D Attentional Convolutional Neural Network. *Remote Sensing*, 11, 21
- Li, J.L., Xiu, J.P., Yang, Z.Q., & Liu, C. (2020). Dual Path Attention Net for Remote Sensing Semantic Image Segmentation. *ISPRS International Journal of Geo-Information*, 9, 20
- Li, K., Hu, X.Y., Jiang, H.W., Shu, Z., & Zhang, M. (2020). Attention-Guided Multi-Scale Segmentation Neural Network for Interactive Extraction of Region Objects from High-Resolution Satellite Imagery. *Remote Sensing*, 12, 23
- Li, P., Zhang, D., Chen, P., Liu, X., & Wulamu, A. (2020). Multi-Adversarial Partial Transfer Learning with Object-Level Attention Mechanism for Unsupervised Remote Sensing Scene Classification. *IEEE Access*, 8, 56650-56665
- Li, R., Wang, X., Wang, J., Song, Y., & Lei, L. (2020). SAR Target Recognition Based on Efficient Fully Convolutional Attention Block CNN. *IEEE Geoscience and Remote Sensing Letters*
- Li, R., Zheng, S.Y., Duan, C.X., Yang, Y., & Wang, X.Q. (2020). Classification of Hyperspectral Image Based on Double-Branch Dual-Attention Mechanism Network. *Remote Sensing*, 12, 25
- Li, X., Lei, L., Sun, Y., Li, M., & Kuang, G. (2020). Multimodal bilinear fusion network with second-order attention-based channel selection for land cover classification. *IEEE Journal of Selected Topics in Applied Earth Observations and Remote Sensing*, 13, 1011-1026
- Li, X., Xu, F., Lyu, X., Tong, Y., Chen, Z., Li, S., & Liu, D. (2020). A Remote-Sensing Image Pan-Sharpening Method Based on Multi-Scale Channel Attention Residual Network. *IEEE Access*, 8, 27163-27177
- Li, Y.S., Chen, R.X., Zhang, Y.J., Zhang, M., & Chen, L. (2020). Multi-Label Remote Sensing Image Scene Classification by Combining a Convolutional Neural Network and a Graph Neural Network. *Remote Sensing*, 12, 17
- Li, Y.Y., Huang, Q., Pei, X., Jiao, L.C., & Shang, R.H. (2020). RADet: Refine Feature Pyramid Network and Multi-Layer Attention Network for Arbitrary-Oriented Object Detection of Remote Sensing Images. *Remote Sensing*, 12, 20
- Li, Z., Cui, X., Wang, L., Zhang, H., Zhu, X., & Zhang, Y. (2021). Spectral and spatial global context attention for hyperspectral image classification. *Remote Sensing*, 13, 1-24
- Li, Z.T., Chen, G.K., & Zhang, T.X. (2019). Temporal Attention Networks for Multitemporal Multisensor Crop Classification. *IEEE Access*, 7, 134677-134690
- Liang, L., & Wang, G. (2021). Efficient recurrent attention network for remote sensing scene classification. *IET Image Processing*
- Liu, D., Li, J., & Yuan, Q. (2021). A Spectral Grouping and Attention-Driven Residual Dense Network for Hyperspectral Image Super-Resolution. *IEEE Transactions on Geoscience and Remote Sensing*
- Liu, Q., Li, Z., Shuai, S., & Sun, Q. (2020). Spectral group attention networks for hyperspectral image classification with spectral separability analysis. *Infrared Physics and Technology*, 108
- Liu, Q., Zhou, H., Xu, Q., Liu, X., & Wang, Y. (2020). PSGAN: A Generative Adversarial Network for Remote Sensing Image Pan-Sharpening. *IEEE Transactions on Geoscience and Remote Sensing*
- Liu, R.C., Cheng, Z.H., Zhang, L.L., & Li, J.X. (2019). Remote Sensing Image Change Detection Based on Information Transmission and Attention Mechanism. *IEEE Access*, 7, 156349-156359
- Lu, X., Zhang, Y., Yuan, Y., & Feng, Y. (2020). Gated and Axis-Concentrated Localization Network for Remote Sensing Object Detection. *IEEE Transactions on Geoscience and Remote Sensing*, 58, 179-192

- Lu, Z., Xu, B., Sun, L., Zhan, T., & Tang, S. (2020). 3-D Channel and Spatial Attention Based Multiscale Spatial-Spectral Residual Network for Hyperspectral Image Classification. *IEEE Journal of Selected Topics in Applied Earth Observations and Remote Sensing*, 13, 4311-4324
- Luo, H., Chen, C., Fang, L., Zhu, X., & Lu, L. (2019). High-Resolution Aerial Images Semantic Segmentation Using Deep Fully Convolutional Network with Channel Attention Mechanism. *IEEE Journal of Selected Topics in Applied Earth Observations and Remote Sensing*, 12, 3492-3507
- Luo, X., Li, X., Wu, Y., Hou, W., Wang, M., Jin, Y., & Xu, W. (2021). Research on Change Detection Method of High-Resolution Remote Sensing Images Based on Subpixel Convolution. *IEEE Journal of Selected Topics in Applied Earth Observations and Remote Sensing*, 14, 1447-1457
- Ma, F., Gao, F., Sun, J.P., Zhou, H.Y., & Hussain, A. (2019). Attention Graph Convolution Network for Image Segmentation in Big SAR Imagery Data. *Remote Sensing*, 11, 21
- Ma, J., Zhang, L.B., & Sun, Y. (2020). ROI Extraction Based on Multiview Learning and Attention Mechanism for Unbalanced Remote Sensing Data Set. *IEEE Transactions on Geoscience and Remote Sensing*, 58, 6210-6223
- Ma, W.P., Zhao, J.L., Zhu, H., Shen, J.C., Jiao, L.C., Wu, Y., & Hou, B.A. (2021). A Spatial-Channel Collaborative Attention Network for Enhancement of Multiresolution Classification. *Remote Sensing*, 13, 27
- Mdrafi, R., Du, Q., Gurbuz, A.C., Tang, B., Ma, L., & Younan, N.H. (2020). Attention-Based Domain Adaptation Using Residual Network for Hyperspectral Image Classification. *IEEE Journal of Selected Topics in Applied Earth Observations and Remote Sensing*, 13, 6424-6433
- Mei, X.G., Pan, E.T., Ma, Y., Dai, X.B., Huang, J., Fan, F., Du, Q.L., Zheng, H., & Ma, J.Y. (2019). Spectral-Spatial Attention Networks for Hyperspectral Image Classification. *Remote Sensing*, 11, 18
- Nie, X., Duan, M., Ding, H., Hu, B., & Wong, E.K. (2020). Attention Mask R-CNN for ship detection and segmentation from remote sensing images. *IEEE Access*, 8, 9325-9334
- Pan, X., Yang, F., Gao, L., Chen, Z., Zhang, B., Fan, H., & Ren, J. (2019). Building extraction from high-resolution aerial imagery using a generative adversarial network with spatial and channel attention mechanisms. *Remote Sensing*, 11
- Pande, S., & Banerjee, B. (2021). Adaptive hybrid attention network for hyperspectral image classification. *Pattern Recognition Letters*, 144, 6-12
- Qi, X., Li, K., Liu, P., Zhou, X., & Sun, M. (2020). Deep Attention and Multi-Scale Networks for Accurate Remote Sensing Image Segmentation. *IEEE Access*, 8, 146627-146639
- Qin, J., Wang, B., Wu, Y.L., Lu, Q., & Zhu, H.C. (2021). Identifying Pine Wood Nematode Disease Using UAV Images and Deep Learning Algorithms. *Remote Sensing*, 13, 14
- Qing, Y.H., & Liu, W.Y. (2021). Hyperspectral Image Classification Based on Multi-Scale Residual Network with Attention Mechanism. *Remote Sensing*, 13, 18
- Qiu, T.Q., Liang, X.J., Du, Q.Y., Ren, F., Lu, P.J., & Wu, C. (2021). Techniques for the Automatic Detection and Hiding of Sensitive Targets in Emergency Mapping Based on Remote Sensing Data. *ISPRS International Journal of Geo-Information*, 10, 21
- Ren, Y., Li, X., Yang, X., & Xu, H. (2021). Development of a Dual-Attention U-Net Model for Sea Ice and Open Water Classification on SAR Images. *IEEE Geoscience and Remote Sensing Letters*
- Ren, Y.F., Yu, Y.T., & Guan, H.Y. (2020). DA-CapsUNet: A Dual-Attention Capsule U-Net for Road Extraction from Remote Sensing Imagery. *Remote Sensing*, 12, 17

- Ribalta Lorenzo, P., Tulczyjew, L., Marcinkiewicz, M., & Nalepa, J. (2020). Hyperspectral Band Selection Using Attention-Based Convolutional Neural Networks. *IEEE Access*, 8, 42384-42403
- Salveti, F., Mazzia, V., Khaliq, A., & Chiaberge, M. (2020). Multi-image super resolution of remotely sensed images using residual attention deep neural networks. *Remote Sensing*, 12
- Sang, Q., Zhuang, Y., Dong, S., Wang, G., & Chen, H. (2020). FRF-Net: Land Cover Classification from Large-Scale VHR Optical Remote Sensing Images. *IEEE Geoscience and Remote Sensing Letters*, 17, 1057-1061
- Shakeel, A., Sultani, W., & Ali, M. (2019). Deep built-structure counting in satellite imagery using attention based re-weighting. *ISPRS Journal of Photogrammetry and Remote Sensing*, 151, 313-321
- Shang, R.H., Zhang, J.Y., Jiao, L.C., Li, Y.Y., Marturi, N., & Stolkin, R. (2020). Multi-scale Adaptive Feature Fusion Network for Semantic Segmentation in Remote Sensing Images. *Remote Sensing*, 12, 20
- Shao, J.Q., Qu, C.W., Li, J.W., & Peng, S.J. (2018). A Lightweight Convolutional Neural Network Based on Visual Attention for SAR Image Target Classification. *Sensors*, 18, 21
- Shen, H., Zhou, C., Li, J., & Yuan, Q. (2021). SAR Image Despeckling Employing a Recursive Deep CNN Prior. *IEEE Transactions on Geoscience and Remote Sensing*, 59, 273-286
- Shen, X., Liu, B., Zhou, Y., Zhao, J., & Liu, M. (2020). Remote sensing image captioning via Variational Autoencoder and Reinforcement Learning. *Knowledge-Based Systems*, 203
- Shi, G., Zhang, J., Liu, J., Zhang, C., Zhou, C., & Yang, S. (2020). Global Context-Augmented Objection Detection in VHR Optical Remote Sensing Images. *IEEE Transactions on Geoscience and Remote Sensing*
- Shi, W., Qin, W., Yun, Z., Ping, P., Wu, K., & Qu, Y. (2021). Attention - based context aware network for semantic comprehension of aerial scenery. *Sensors*, 21, 1-23
- Sumbul, G., Cinbis, R.G., & Aksoy, S. (2019). Multisource Region Attention Network for Fine-Grained Object Recognition in Remote Sensing Imagery. *IEEE Transactions on Geoscience and Remote Sensing*, 57, 4929-4937
- Sun, H., Zheng, X., Lu, X., & Wu, S. (2020). Spectral-Spatial Attention Network for Hyperspectral Image Classification. *IEEE Transactions on Geoscience and Remote Sensing*, 58, 3232-3245
- Tan, S.Y., Chen, L.F., Pan, Z.H., Xing, J., Li, Z.H., & Yuan, Z.H. (2020). Geospatial Contextual Attention Mechanism for Automatic and Fast Airport Detection in SAR Imagery. *IEEE Access*, 8, 173627-173640
- Tang, X., Meng, F., Zhang, X., Cheung, Y.M., Ma, J., Liu, F., & Jiao, L. (2021). Hyperspectral Image Classification Based on 3-D Octave Convolution with Spatial-Spectral Attention Network. *IEEE Transactions on Geoscience and Remote Sensing*, 59, 2430-2447
- Tian, Z.Z., Zhan, R.H., Hu, J.M., Wang, W., He, Z.Q., & Zhuang, Z.W. (2020). Generating Anchor Boxes Based on Attention Mechanism for Object Detection in Remote Sensing Images. *Remote Sensing*, 12, 18
- Tong, W., Chen, W., Han, W., Li, X., & Wang, L. (2020). Channel-Attention-Based DenseNet Network for Remote Sensing Image Scene Classification. *IEEE Journal of Selected Topics in Applied Earth Observations and Remote Sensing*, 13, 4121-4132
- Wang, H., Hu, Q., Wu, C.D., Chi, J.N., & Yu, X.S. (2020). Non-Locally up-Down Convolutional Attention Network for Remote Sensing Image Super-Resolution. *IEEE Access*, 8, 166304-166319

- Wang, J., Huang, R., Guo, S., Li, L., Zhu, M., Yang, S., & Jiao, L. (2021). NAS-Guided Lightweight Multiscale Attention Fusion Network for Hyperspectral Image Classification. *IEEE Transactions on Geoscience and Remote Sensing*
- Wang, J., Xiao, H., Chen, L., Xing, J., Pan, Z., Luo, R., & Cai, X. (2021). Integrating weighted feature fusion and the spatial attention module with convolutional neural networks for automatic aircraft detection from sar images. *Remote Sensing*, 13, 1-21
- Wang, J., Zhou, J., & Huang, W.Q. (2019). Attend in Bands: Hyperspectral Band Weighting and Selection for Image Classification. *IEEE Journal of Selected Topics in Applied Earth Observations and Remote Sensing*, 12, 4712-4727
- Wang, L., Peng, J.T., & Sun, W.W. (2019). Spatial-Spectral Squeeze-and-Excitation Residual Network for Hyperspectral Image Classification. *Remote Sensing*, 11, 16
- Wang, Q., Liu, S.T., Chanussot, J., & Li, X.L. (2019). Scene Classification With Recurrent Attention of VHR Remote Sensing Images. *IEEE Transactions on Geoscience and Remote Sensing*, 57, 1155-1167
- Wang, R., Shao, S., An, M., Li, J., Wang, S., & Xu, X. (2021). Soft Thresholding Attention Network for Adaptive Feature Denoising in SAR Ship Detection. *IEEE Access*, 9, 29090-29105
- Wang, S.S., Hou, X.W., & Zhao, X. (2020). Automatic Building Extraction From High-Resolution Aerial Imagery via Fully Convolutional Encoder-Decoder Network With Non-Local Block. *IEEE Access*, 8, 7313-7322
- Wang, Y., Ding, W., Zhang, R., & Li, H. (2021). Boundary-Aware Multitask Learning for Remote Sensing Imagery. *IEEE Journal of Selected Topics in Applied Earth Observations and Remote Sensing*, 14, 951-963
- Wang, Y.M., Ji, S.P., Lu, M., & Zhang, Y.J. (2020). Attention boosted bilinear pooling for remote sensing image retrieval. *International Journal of Remote Sensing*, 41, 2704-2724
- Wang, Z.S., Zou, C., & Cai, W.W. (2020). Small Sample Classification of Hyperspectral Remote Sensing Images Based on Sequential Joint Deeping Learning Model. *IEEE Access*, 8, 71353-71363
- Wong, R., Zhang, Z.J., Wang, Y.M., Chen, F.S., & Zeng, D. (2020). HSI-IPNet: Hyperspectral Imagery Inpainting by Deep Learning With Adaptive Spectral Extraction. *IEEE Journal of Selected Topics in Applied Earth Observations and Remote Sensing*, 13, 4369-4380
- Wu, H.L., Zhao, S.Z., Li, L., Lu, C.Q., & Chen, W. (2020). Self-Attention Network With Joint Loss for Remote Sensing Image Scene Classification. *IEEE Access*, 8, 210347-210359
- Wu, P.D., Cui, Z.G., Gan, Z.L., & Liu, F. (2020). Residual Group Channel and Space Attention Network for Hyperspectral Image Classification. *Remote Sensing*, 12, 27
- Wu, T., Hu, Y., Peng, L., & Chen, R.N. (2020). Improved Anchor-Free Instance Segmentation for Building Extraction from High-Resolution Remote Sensing Images. *Remote Sensing*, 12, 15
- Wu, Z., Hou, B., & Jiao, L. (2021). Multiscale CNN with Autoencoder Regularization Joint Contextual Attention Network for SAR Image Classification. *IEEE Transactions on Geoscience and Remote Sensing*, 59, 1200-1213
- Wu, Z.C., Li, J., Wang, Y.S., Hu, Z.W., & Molinier, M. (2020). Self-Attentive Generative Adversarial Network for Cloud Detection in High Resolution Remote Sensing Images. *IEEE Geoscience and Remote Sensing Letters*, 17, 1792-1796
- Xia, M., Li, Y., Zhang, Y.H., Weng, L.G., & Liu, J. (2020). Cloud/snow recognition of satellite cloud images based on multiscale fusion attention network. *Journal of Applied Remote Sensing*, 14, 19



Xia, M., Qian, J.H., Zhang, X.D., Liu, J., & Xu, Y.Q. (2019). River segmentation based on separable attention residual network. *Journal of Applied Remote Sensing*, 14, 15

Xiao, D., Wang, Z., Wu, Y., Gao, X., & Sun, X. (2020). Terrain Segmentation in Polarimetric SAR Images Using Dual-Attention Fusion Network. *IEEE Geoscience and Remote Sensing Letters*

Xu, J.F., Zhu, Y., Zhong, R.H., Lin, Z.X., Xu, J.L., Jiang, H., Huang, J.F., Li, H.F., & Lin, T. (2020). DeepCropMapping: A multi-temporal deep learning approach with improved spatial generalizability for dynamic corn and soybean mapping. *Remote Sensing of Environment*, 247, 18

Xu, R.D., Tao, Y.T., Lu, Z.Y., & Zhong, Y.F. (2018). Attention-Mechanism-Containing Neural Networks for High-Resolution Remote Sensing Image Classification. *Remote Sensing*, 10, 29

Xue, Z., Zhang, M., Liu, Y., & Du, P. (2021). Attention-Based Second-Order Pooling Network for Hyperspectral Image Classification. *IEEE Transactions on Geoscience and Remote Sensing*

Yang, H., Wu, P.H., Yao, X.D., Wu, Y.L., Wang, B., & Xu, Y.Y. (2018). Building Extraction in Very High Resolution Imagery by Dense-Attention Networks. *Remote Sensing*, 10, 16

Yang, J., Ren, C., Zhou, X., He, X.H., & Wang, Z.Y. (2019). Super-resolution for remote sensing images via dual-domain network learning. *Journal of Electronic Imaging*, 28, 12

Yang, Q., Wang, C., & Zeng, T. (2021). A method of water change monitoring in remote image time series based on long short time memory. *Remote Sensing Letters*, 12, 67-76

Yang, X.F., Zhang, X.F., Ye, Y.M., Lau, R.Y.K., Lu, S.J., Li, X.T., & Huang, X.H. (2020). Synergistic 2D/3D Convolutional Neural Network for Hyperspectral Image Classification. *Remote Sensing*, 12, 19

Yao, Z., Jia, J., & Qian, Y. (2021). Mcnet: Multi-scale feature extraction and content-aware reassembly cloud detection model for remote sensing images. *Symmetry*, 13, 1-13

Ye, Z.R., Fu, Y.Y., Gan, M.Y., Deng, J.S., Comber, A., & Wang, K. (2019). Building Extraction from Very High Resolution Aerial Imagery Using Joint Attention Deep Neural Network. *Remote Sensing*, 11, 21

You, H., Tian, S., Yu, L., & Lv, Y. (2020). Pixel-Level Remote Sensing Image Recognition Based on Bidirectional Word Vectors. *IEEE Transactions on Geoscience and Remote Sensing*, 58, 1281-1293

Yu, C., Han, R., Song, M., Liu, C., & Chang, C. (2021). Feedback Attention-Based Dense CNN for Hyperspectral Image Classification. *IEEE Transactions on Geoscience and Remote Sensing*

Yu, Y., Li, X., & Liu, F. (2020). Attention GANs: Unsupervised Deep Feature Learning for Aerial Scene Classification. *IEEE Transactions on Geoscience and Remote Sensing*, 58, 519-531

Yuan, Z., Huang, W., Li, L., & Luo, X. (2021). Few-Shot Scene Classification with Multi-Attention Deepemd Network in Remote Sensing. *IEEE Access*, 9, 19891-19901

Zeng, Y.L., Ritz, C., Zhao, J.H., & Lan, J.H. (2020). Attention-Based Residual Network with Scattering Transform Features for Hyperspectral Unmixing with Limited Training Samples. *Remote Sensing*, 12, 18

Zhang, B., Zhang, Y., & Wang, S. (2019). A Lightweight and Discriminative Model for Remote Sensing Scene Classification with Multidilation Pooling Module. *IEEE Journal of Selected Topics in Applied Earth Observations and Remote Sensing*, 12, 2636-2653

Zhang, C., Yue, J., & Qin, Q. (2020). Global prototypical network for few-shot hyperspectral image classification. *IEEE Journal of Selected Topics in Applied Earth Observations and Remote Sensing*, 13, 4748-4759

Zhang, H., Ma, J., Chen, C., & Tian, X. (2020). NDVI-Net: A fusion network for generating high-resolution normalized difference vegetation index in remote sensing. *ISPRS Journal of Photogrammetry and Remote Sensing*, 168, 182-196

Zhang, J., Wei, F.Y., Feng, F., & Wang, C.Y. (2020). Spatial-Spectral Feature Refinement for Hyperspectral Image Classification Based on Attention-Dense 3D-2D-CNN. *Sensors*, 20, 19

Zhang, J., Zhou, Q., Wu, J., Wang, Y.C., Wang, H., Li, Y.S., Chai, Y.Z., & Liu, Y. (2020). A Cloud Detection Method Using Convolutional Neural Network Based on Gabor Transform and Attention Mechanism with Dark Channel Subnet for Remote Sensing Image. *Remote Sensing*, 12, 19

Zhang, M., An, J., Yu, D.H., Yang, L.D., Wu, L., & Lu, X.Q. (2020). Convolutional Neural Network With Attention Mechanism for SAR Automatic Target Recognition. *IEEE Geoscience and Remote Sensing Letters*

Zhang, P., Du, P.J., Lin, C., Wang, X., Li, E.R., Xue, Z.H., & Bai, X.Y. (2020). A Hybrid Attention-Aware Fusion Network (HAFNet) for Building Extraction from High-Resolution Imagery and LiDAR Data. *Remote Sensing*, 12, 20

Zhang, S., Yuan, Q., Yuan, Q., Li, J., Sun, J., & Zhang, X. (2020). Scene-adaptive remote sensing image super-resolution using a multiscale attention network. *IEEE Transactions on Geoscience and Remote Sensing*, 58, 4764-4779

Zhang, S.Y., Li, C.R., Qiu, S., Gao, C.X., Zhang, F., Du, Z.H., & Liu, R.Y. (2020). EMMCNN: An ETSPS-Based Multi-Scale and Multi-Feature Method Using CNN for High Spatial Resolution Image Land-Cover Classification. *Remote Sensing*, 12, 33

Zhang, X., Wang, H., Xu, C., Lv, Y., Fu, C., Xiao, H., & He, Y. (2019). A Lightweight Feature Optimizing Network for Ship Detection in SAR Image. *IEEE Access*, 7, 141662-141678

Zhang, X., Wang, Y., Zhang, N., Xu, D., Luo, H., Chen, B., & Ben, G. (2020). SSDANet: Spectral-Spatial Three-Dimensional Convolutional Neural Network for Hyperspectral Image Classification. *IEEE Access*, 8, 127167-127180

Zhang, X., Zhang, T., Shi, J., & Wei, S. (2019). High-speed and High-accurate SAR Ship Detection Based on a Depthwise Separable Convolution Neural Network. *Journal of Radars*, 8, 841-851

Zhang, X.H. Research on Remote Sensing Image De-haze Based on GAN. *Journal of Signal Processing Systems for Signal Image and Video Technology*, 9

Zhang, X.K., Pun, M.O., & Liu, M. (2021). Semi-Supervised Multi-Temporal Deep Representation Fusion Network for Landslide Mapping from Aerial Orthophotos. *Remote Sensing*, 13, 22

Zhang, Y., Zhang, S.Z., Li, Y., & Zhang, Y.N. (2020). Coarse-to-Fine Satellite Images Change Detection Framework via Boundary-Aware Attentive Network. *Sensors*, 20, 21

Zhang, Y.D., Chen, G., Vukomanovic, J., Singh, K.K., Liu, Y., Holden, S., & Meentemeyer, R.K. (2020). Recurrent Shadow Attention Model (RSAM) for shadow removal in high-resolution urban land-cover mapping. *Remote Sensing of Environment*, 247, 14

Zhao, L., Yi, J., Li, X., Hu, W., Wu, J., & Zhang, G. (2021). Compact Band Weighting Module Based on Attention-Driven for Hyperspectral Image Classification. *IEEE Transactions on Geoscience and Remote Sensing*

Zhao, Y., Zhao, L., Xiong, B., & Kuang, G. (2020). Attention receptive pyramid network for ship detection in SAR images. *IEEE Journal of Selected Topics in Applied Earth Observations and Remote Sensing*, 13, 2738-2756

- Zhao, Z., Wang, H., & Yu, X. (2021). Spectral-Spatial Graph Attention Network for Semisupervised Hyperspectral Image Classification. *IEEE Geoscience and Remote Sensing Letters*
- Zheng, J., Feng, Y., Bai, C., & Zhang, J. (2021). Hyperspectral Image Classification Using Mixed Convolutions and Covariance Pooling. *IEEE Transactions on Geoscience and Remote Sensing*, 59, 522-534
- Zheng, J., Fu, H., Li, W., Wu, W., Zhao, Y., Dong, R., & Yu, L. (2020). Cross-regional oil palm tree counting and detection via a multi-level attention domain adaptation network. *ISPRS Journal of Photogrammetry and Remote Sensing*, 167, 154-177
- Zheng, Z., Zhong, Y., Ma, A., & Zhang, L. (2020). FPGA: Fast Patch-Free Global Learning Framework for Fully End-to-End Hyperspectral Image Classification. *IEEE Transactions on Geoscience and Remote Sensing*, 58, 5612-5626
- Zhou, D., Wang, G., He, G., Long, T., Yin, R., Zhang, Z., Chen, S., & Luo, B. (2020). Robust building extraction for high spatial resolution remote sensing images with self-attention network. *Sensors (Switzerland)*, 20, 1-19
- Zhou, M., Zou, Z., Shi, Z., Zeng, W.J., & Gui, J. (2020). Local Attention Networks for Occluded Airplane Detection in Remote Sensing Images. *IEEE Geoscience and Remote Sensing Letters*, 17, 381-385
- Zhu, H., Ma, W., Li, L., Jiao, L., Yang, S., & Hou, B. (2020). A Dual-Branch Attention fusion deep network for multiresolution remote-Sensing image classification. *Information Fusion*, 58, 116-131
- Zhu, M., Jiao, L., Liu, F., Yang, S., & Wang, J. (2021). Residual Spectral-Spatial Attention Network for Hyperspectral Image Classification. *IEEE Transactions on Geoscience and Remote Sensing*, 59, 449-462
- Zhu, P., Tan, Y., Zhang, L., Wang, Y., Mei, J., Liu, H., & Wu, M. (2020). Deep Learning for Multilabel Remote Sensing Image Annotation with Dual-Level Semantic Concepts. *IEEE Transactions on Geoscience and Remote Sensing*, 58, 4047-4060
